# Supplementary material
Source: MDPI journal article supplement (https://www.mdpi.com/2304-6740/10/11/213)
Supplement: s1 [file s1]

## Supplementary Materials

Electrodeposited PPy@TiO<sub>2</sub>, and PEDOT@TiO<sub>2</sub> counter electrodes for  
[Co(bpy)<sub>3</sub>]<sup>2+/3+</sup> redox mediator-based dye sensitized solar cells

Abdelaal. S. A. Ahmed <sup>1\*</sup>, Xie Yi<sup>2</sup>, Xiujian Zhao <sup>2\*</sup>, Wanchun Xiang <sup>2,3</sup>, Mohammed Abdelmotallieb <sup>1</sup>

<sup>1</sup> Chemistry Department, Faculty of Science, Al-Azhar University, Assiut 71524, Egypt

<sup>2</sup> State Key Laboratory of Silicate Materials for Architecture, Wuhan University of Technology, Luoshi Road, Wuhan 430070, China

<sup>3</sup> Key Laboratory for Applied Surface and Colloid Chemistry, Ministry of Education, Shaanxi Key Laboratory for Advanced Energy Devices, Shaanxi Engineering Lab for Advanced Energy Technology, School of Materials Science & Engineering, Shaanxi Normal University, Xi'an 710119, China

\*Correspondence:

(A. S. A. Ahmed) abdelaalsaiyd@azhar.edu.eg; Tel. (+00201553681043); (X. Zhao) opluse@whut.edu.cn

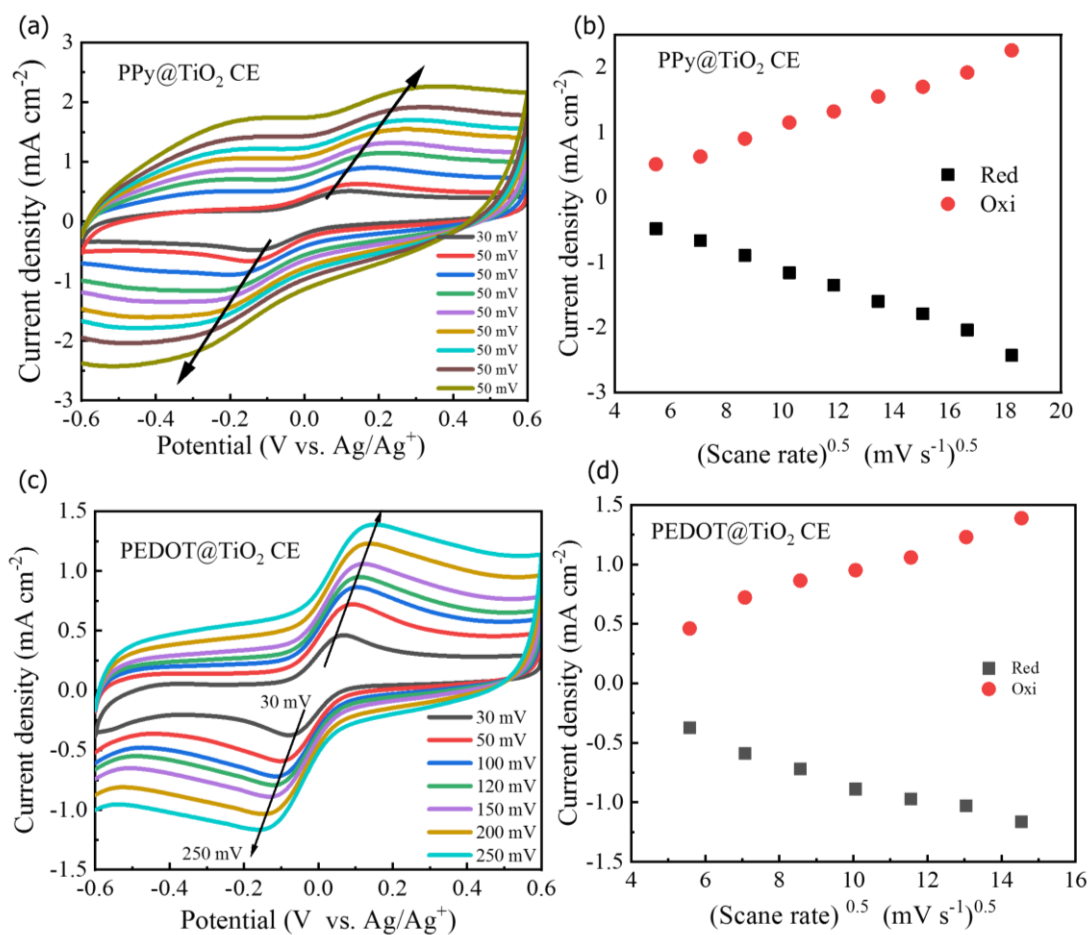

Figure S1: (a, c) CV curves of various PPy@TiO<sub>2</sub> and PEDOT@TiO<sub>2</sub> CEs with [Co(bpy)<sub>3</sub>]<sup>2+/3+</sup> redox couple at different scan rates, and (b, d) the relationship between peak current density and the square root of scan rates.
